# Supplementary material for: Two Phages of the Genera Felixunavirus Subjected to 12 Hour Challenge on Salmonella Infantis Showed Distinct Genotypic and Phenotypic Changes
Source: Viruses. 2019 Jun 27;11(7):586. doi: 10.3390/v11070586 (PMC6669636; doi:10.3390/v11070586)
Supplement: Supplementary file 1 [file viruses-11-00586-s001.pdf]

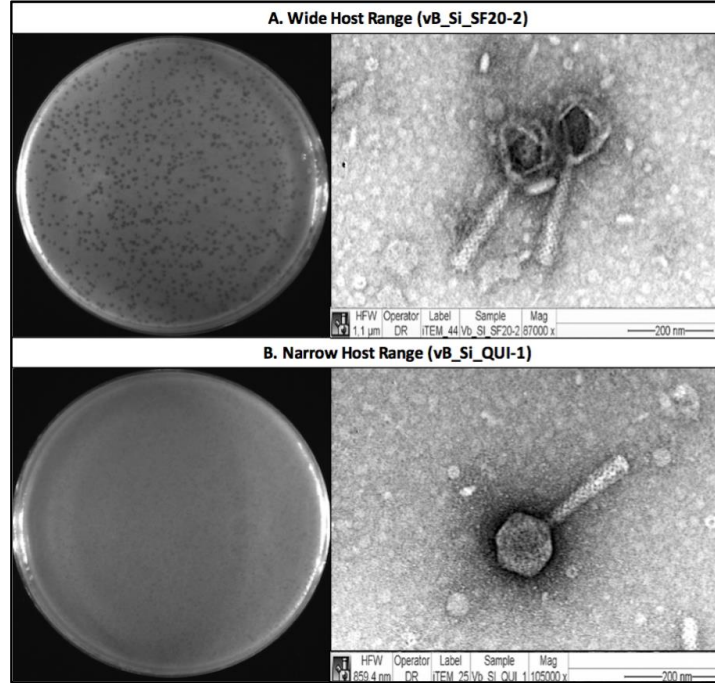

**Figure S1. Morphology of lysis plaques and electron microscopy of wide host range and narrow host range phages.** Morphology of lysis plaques and electron microscopy of transmission in (A) wide host range phage (B) narrow host range phage.

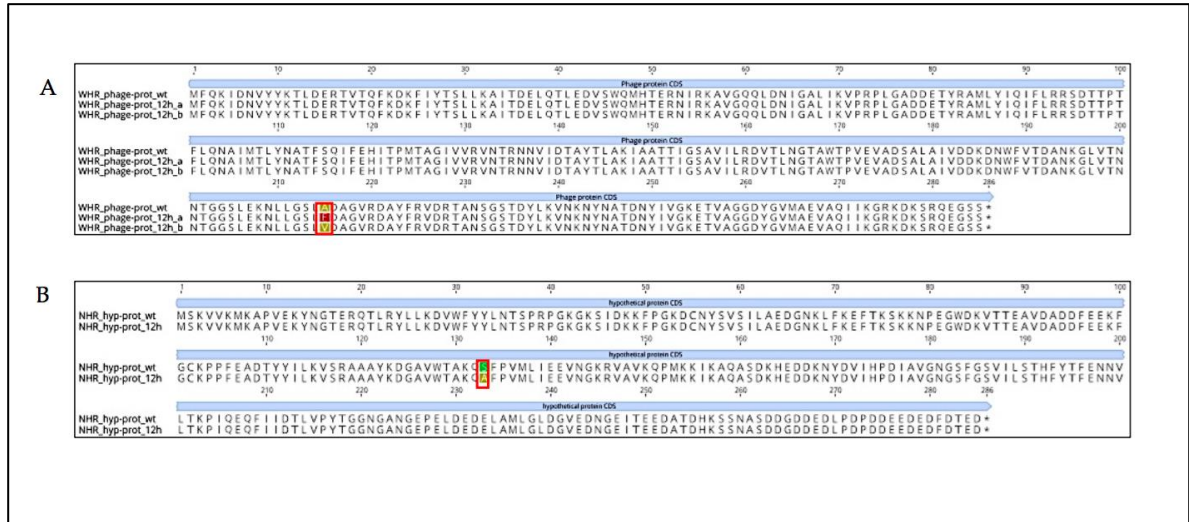

**Figure S2. Amino acid alignment of phage protein and hypothetical protein in wild-type phage compared to WHR or NHR phage exposed to *S. Infantis* for 12-h.** (A) Amino acid alignment of phage protein in wild-type WHR phage and WHR phage exposed to *S. Infantis* for 12-h. Sequences a and b represent two different mutations observed at the same position. (B) Amino acid alignment of hypothetical protein in wild-type NHR phage and NHR phage exposed to *S. Infantis* for 12-h. The nucleotide sequence of the gene from the wild type genome was extracted and modified to reflect the mutation, then the wild type and mutation-containing nucleotide sequences were translated and aligned with ClustalW[75] in Geneious Prime[76]. Amino acids labeled with different colors represent differences among sequences of wild-type phages and the 12-h exposed phages. Amino acid changes caused by SNPs are marked in red frames.

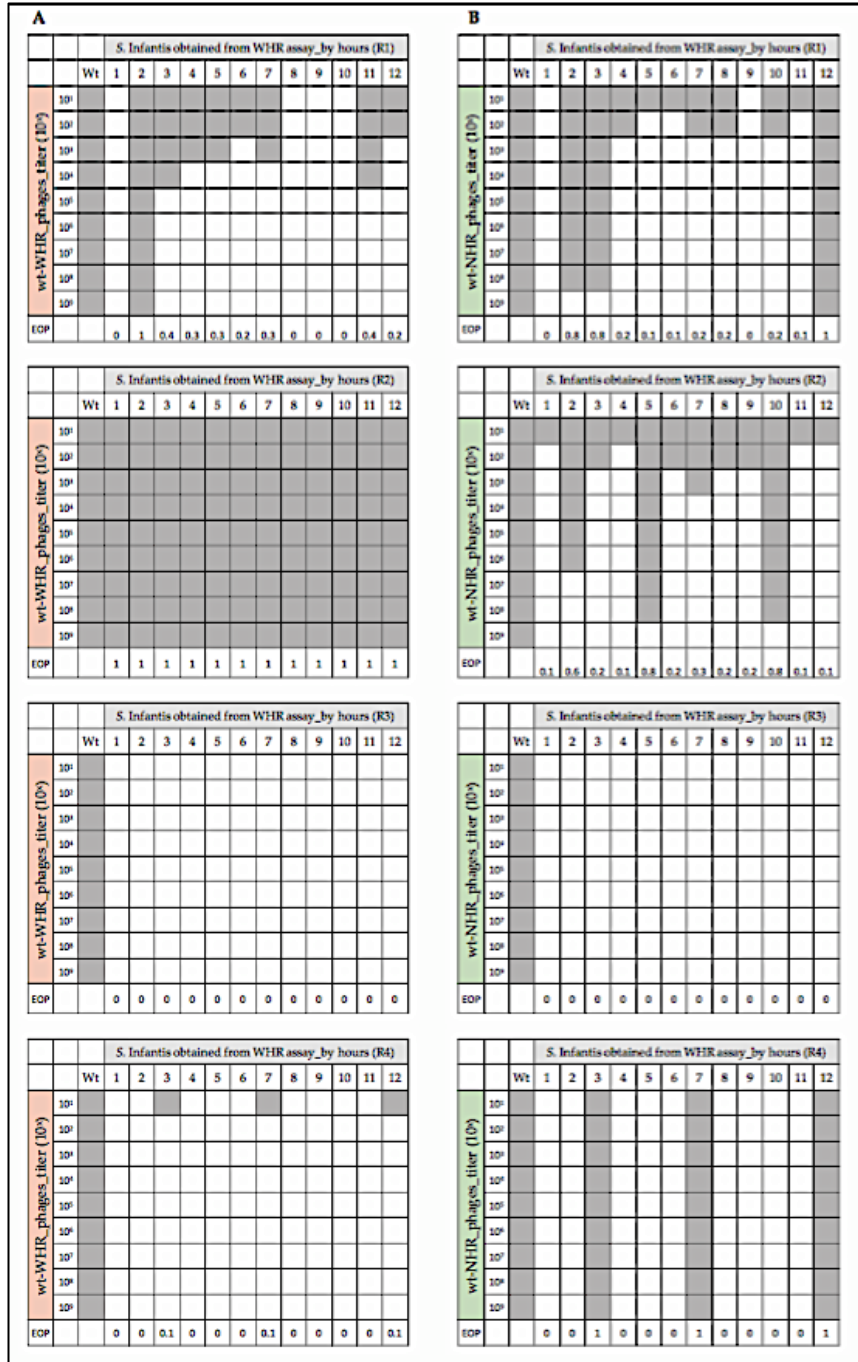

**Figure S3. Evaluation of phage sensitivity by efficiency of plating (EOP) on isolated *S. Infantis* SI survivors to WHR phage and cross-resistance assays.** It shows the titer of the wild type phage on *S. Infantis* obtained from challenge assay. Lysis is marked in grey and no lysis in white. A. Evaluation of phage sensitivity of EOP in *S. Infantis* obtained every hours of wide assay, exposed to wild type (wt)-WHR phage. B. Cross-resistance assay of EOP in *S. Infantis* obtained every hour of wide assay, exposed to wild type (wt)-NHR phage.

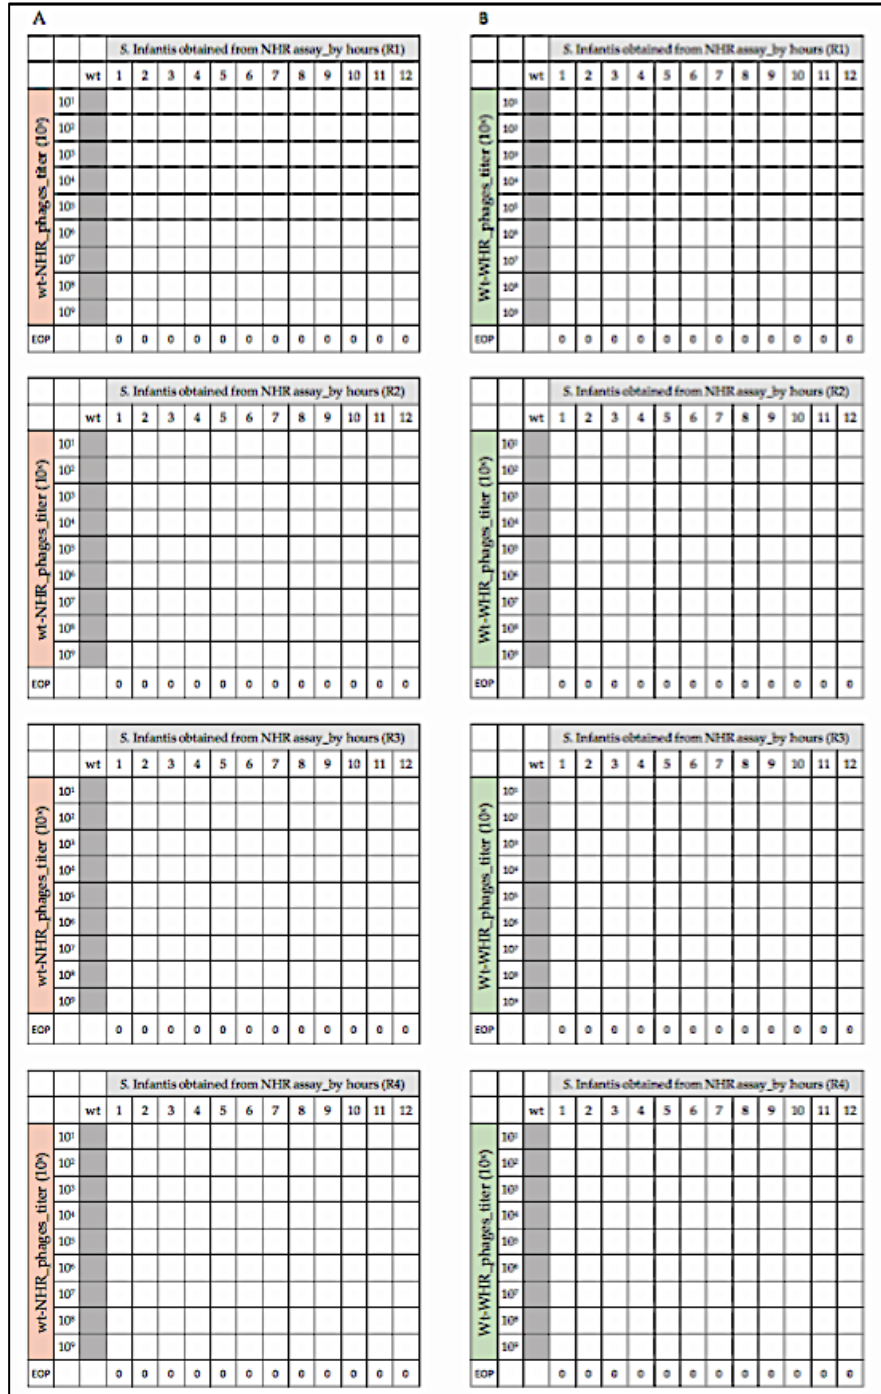

**Figure S4. Evaluation of phage sensitivity by efficiency of plating (EOP) on isolated SI survivors to NHR phage and cross-resistance assays.** It shows the titer of the wild type phage on *S. Infantis* obtained from challenge assay. Lysis is marked in grey and no lysis in white. **A.** EOP in *S. Infantis* obtained every hour of narrow assay, exposed to (wt) wild type-NHR phage. **B.** Cross-resistance assay of EOP in *S. Infantis* obtained every hours of narrow assay, exposed to wild type (wt)-WHR phage.

**Table S1.** Antigenic somatic formulae (O) and presence of *rfaB* and *rfaK* gene in serovars of *Salmonella enterica* susceptible to wide and narrow host range phages obtained from challenge assays.

| <b>Characteristics of susceptible serovars of both wide and narrow host range phages</b> |                                     |                                                     |                                                     |
|------------------------------------------------------------------------------------------|-------------------------------------|-----------------------------------------------------|-----------------------------------------------------|
| Serovars (Serogroup)                                                                     | Somatic antigenic (O) formulae      | Presence <i>rfaB</i> <sup>1</sup> (ID) <sup>2</sup> | Presence <i>rfaK</i> <sup>3</sup> (ID) <sup>2</sup> |
| Typhimurium (Group O:4 [B])                                                              | 1,4,[5],12                          | TMV96147.1                                          | ASF66624.1                                          |
| Virchow (Group O:7 [C <sub>1</sub> ])                                                    | 6,7,14                              | AZH72471.1                                          | AZH72476.1                                          |
| Oranienburg (Group O:7 [C <sub>1</sub> ])                                                | 6,7,14                              | THC06534.1                                          | SUH68841.1                                          |
| Braenderup (Group O:7 [C <sub>1</sub> ])                                                 | 6,7,14                              | Not found <sup>4</sup>                              | SUH55395.1                                          |
| Infantis (Group O:7 [C <sub>1</sub> ])                                                   | 6,7,14                              | TMV47934.1                                          | SQI71138.1                                          |
| Newport (Group O:8 [C <sub>2</sub> ])                                                    | 6,8,20                              | TMM69866.1                                          | AGS27141.1                                          |
| Corvallis (Group O:8 [C <sub>3</sub> ])                                                  | 8,20                                | TLC03182.1                                          | Not found <sup>4</sup>                              |
| Kentucky (Group O:8 [C <sub>3</sub> ])                                                   | 8,20                                | TMW25308.1                                          | KUD18860.1                                          |
| Javiana (Group O:9 [D <sub>1</sub> ])                                                    | 1,9,12                              | Not found <sup>4</sup>                              | KUD61483.1                                          |
| Dublin (Group O:9 [D <sub>1</sub> ])                                                     | 1,9,12                              | TKX13464.1                                          | SUI05380.1                                          |
| Panama (Group O:9 [D <sub>1</sub> ])                                                     | 1,9,12                              | Not found <sup>4</sup>                              | SUH76918.1                                          |
| <b>Characteristics of susceptible serovars of only wide host range phage</b>             |                                     |                                                     |                                                     |
| Muenster (Group O:3,10 [E <sub>1</sub> ])                                                | 3,{10}{15}{15,34}                   | Not found <sup>4</sup>                              | KTW46212.1                                          |
| Agona (Group O:4 [B])                                                                    | 1,4,[5],12                          | TLA84965.1                                          | RKD15901.1                                          |
| Saintpaul (Group O:4 [B])                                                                | 1,4,[5],12                          | QCW59584.1                                          | KUD72187.1                                          |
| Heidelberg (Group O:4[B])                                                                | 1,4,[5],12                          | TMV96713.1                                          | RFN36928.1                                          |
| I 4,5,12:i:- (monophasic variant of Typhimurium) (Group O:4 [B])                         | 4,5,12                              | BBH80090.1                                          | BBH80095.1                                          |
| Stanley (Group O:4 [B])                                                                  | 1,4,[5],12,[27]                     | TLC20503.1                                          | SQH42842.1                                          |
| Choleraesuis (Group O:7 [C <sub>1</sub> ])                                               | 6,7                                 | Not found <sup>4</sup>                              | Not found <sup>4</sup>                              |
| Mbandaka (Group O:7 [C <sub>1</sub> ])                                                   | 6,7,14                              | RJJ85429.1                                          | RAN13577.1                                          |
| Montevideo (Group O:7 [C <sub>1</sub> ] or O:54 <sup>5</sup> )                           | 6,7,14 or {6,7,14}{54} <sup>5</sup> | TMM93554.1                                          | AJQ76118.1                                          |
| Enteritidis (Group O:9 [D <sub>1</sub> ])                                                | 1,9,12                              | TLC90283.1                                          | SUI12981.1                                          |

<sup>1</sup>(*rfaB*) gene encoding for the enzyme waaB engaged in the polymerization of core LPS adding UDP-D-galactose lipopolysaccharide

1,6 glucosyltransferase or Lipopolysaccharide 1,6-galactosyltransferase.

<sup>2</sup>GenBank ID: Accession number.

<sup>3</sup>(*rfaK*) gene encoding for the enzyme waak engaged in the polymerization of core LPS adding UDP-D-glucose:lipopolysaccharidealpha-1,2 glucosyltransferase or lipopolysaccharide 1,2-N acetylglucosaminetransferase.

<sup>4</sup>Not Found: These genes were not found in the mentioned serovars but have been described for *Salmonella enterica*.

<sup>5</sup>Factor O:54 is plasmid-controlled. In serovar Montevideo, factors O:6,7,14 are expressed in the absence of O:54. Reference of Somatic antigenic (O) formulae: Grimont et al,[82].
